# Supplementary material
Source: publisher figshare collection journal article supplement (https://gsajournals.figshare.com/articles/dataset/_/7640345)
Supplement: Supplementary file 1 [file 1]

| Supplementary Table 1. RNAi Lines Screened (using MS1096-GAL4 driver) |         |                                                             |                                  |                                    |                                   |                                                                    |
|-----------------------------------------------------------------------|---------|-------------------------------------------------------------|----------------------------------|------------------------------------|-----------------------------------|--------------------------------------------------------------------|
| BL#/VRDC#                                                             | CG#     | Gene Name                                                   | Wing Defect %<br>Penetrance Male | Wing Defect %<br>Penetrance Female | Wing Defect %<br>Penetrance Total | Defect Phenotypes                                                  |
| <b>Calcium Channels</b>                                               |         |                                                             |                                  |                                    |                                   |                                                                    |
| BL27263                                                               | CG9126  | Stromal interaction molecule (Stim)                         | 100                              | 100                                | 100                               | Wings small and malformed, thick veins, blisters                   |
| BL31292                                                               | CG31284 | water witch (wtrw)                                          | 69                               | 39                                 | 53                                | PCV incomplete                                                     |
| BL31295                                                               | CG5842  | nanchung (nan)                                              | 84                               | 32                                 | 54                                | L5 incomplete, L5 bifurcation                                      |
| BL25937                                                               | CG1063  | Inositol 1,4,5,-tris-phosphate receptor (Itpr83A)           | 29                               | 26                                 | 27                                | L4 bifurcation                                                     |
| BL26251                                                               | CG15899 | Ca2+-channel protein $\alpha$ 1 subunit T (Ca- $\alpha$ 1T) | 73                               | 25                                 | 52                                | Incomplete L5, L4 bifurcation                                      |
| BL31385                                                               | CG13762 | brivido-3 (brv3)                                            | 46                               | 12                                 | 30                                | L5 bifurcation, PCV incomplete                                     |
| BL27244                                                               | CG43368 | Cacophony (Cac)                                             | 64                               | 0                                  | 32                                |                                                                    |
| BL31384                                                               | CG5751  | Transient receptor potential cation channel A1 (TrpA1)      | 26                               | 0                                  | 12                                | PCV incomplete, L5 bifurcation, L4 incomplete                      |
| BL31496                                                               | CG9472  | brivido-1 (brv1)                                            | 23                               | 0                                  | 10                                | PCV bifurcation                                                    |
| <b>Sodium Channels</b>                                                |         |                                                             |                                  |                                    |                                   |                                                                    |
| BL25847                                                               | CG1058  | ripped pocket (rpk)                                         | 100                              | 85                                 | 92                                | L5 incomplete & bifurcation, L4 bifurcation                        |
| BL27088                                                               | CG33349 | pickpocket 25 (ppk25)                                       | 22.2                             | 37.2                               | 29.7                              | PCV bifurcation, L5 bifurcation                                    |
| BL25810                                                               | CG18110 | pickpocket 30 (ppk30)                                       | 73                               | 30                                 | 55                                | PCV incomplete, L4 & L5 bifurcations, L5 incomplete, ectopic veins |
| BL25849                                                               | CG12048 | pickpocket 21 (ppk21)                                       | 100                              | 25                                 | 66                                | Crumpled with venation defect, crumpled wg, necrotic spot, bristle |
| BL26006                                                               | CG15555 | pickpocket 24 (ppk24)                                       | 100                              | 23                                 | 63                                | Crumpled wg, venation defect, crumpled, bristle, pcv br            |
| BL25817                                                               | CG33508 | pickpocket 13 (ppk13)                                       | 50                               | 18                                 | 33                                | PCV incomplete, L4 bifurcation, ectopic veins                      |
| BL28012                                                               | CG14239 | pickpocket 15 (ppk15)                                       | 50                               | 18                                 | 32                                | PCV & L5 bifurcations, PCV incomplete, ectopic vein                |
| BL25922                                                               | CG9499  | pickpocket 7 (ppk7)                                         | 13                               | 17                                 | 15                                | PCV bifurcation, PCV incomplete                                    |
| BL27091                                                               | CG9501  | pickpocket 14 (ppk14)                                       | 50                               | 15                                 | 29                                | PCV & L5 bifurcation, PCV incomplete, ectopic vein                 |
| BL25825                                                               | CG8546  | pickpocket 26 (ppk26)                                       | 50                               | 10                                 | 25                                |                                                                    |
| BL29571                                                               | CG3478  | pickpocket (ppk)                                            | 82                               | 7                                  | 36                                |                                                                    |
| BL26249                                                               | CG1232  | temperature-induced paralytic E (tipE)                      | 39                               | 6                                  | 24                                | L5 bifurcation                                                     |
| <b>Potassium Channels</b>                                             |         |                                                             |                                  |                                    |                                   |                                                                    |
| VDCR28430                                                             | CG44159 | Inwardly rectifying potassium channel 1 (Irk1)              | 100                              | 90.5                               | 94.7                              | L5 & L4 bifurcations, loss of ACV, thick veins                     |
| VDCR108140                                                            | CG4370  | Inwardly rectifying potassium channel 2 (Irk2)              | 92.8                             | 84.6                               | 88.8                              | L5 & L4 bifurcations, loss of ACV, thick veins                     |

|                                     |         |                                                              |      |     |      |                                                                        |
|-------------------------------------|---------|--------------------------------------------------------------|------|-----|------|------------------------------------------------------------------------|
| VDRC101174                          | CG10369 | Inwardly rectifying potassium channel 3 (Irk3)               | 100  | 30  | 47.3 | L5 & L4 bifurcations, loss of ACV, thick veins                         |
| BL26011                             | CG34396 | N/A                                                          | 45.4 | 7   | 28   | PCV & L5 bifurcations, PCV incomplete, thickened veins                 |
| BL27264                             | CG9361  | TWIK-related acid-sensitive K <sup>+</sup> channel 7 (Task7) | 34   | 6   | 20   | PCV incomplete, L3 bifurcation, ectopic vein                           |
| BL25853                             | CG8713  | sandman (sand)                                               | 94   | 6   | 52   | L4 abnormalities                                                       |
| BL51014                             | CG2121  | N/A                                                          | 62   | 4   | 35   | Missing ACV, ACV incomplete, PCV incomplete, PCV bifurcation           |
| BL25878                             | CG10864 | N/A                                                          | 25   | 0   | 11.3 | PCV incomplete, L5 bifurcation                                         |
| BL25921                             | CG9194  | N/A                                                          | 73   | 0   | 41   | PCV incomplete, L5 bifurcation, ectopic vein                           |
| <b>Chloride Channels</b>            |         |                                                              |      |     |      |                                                                        |
| BL42654                             | CG10173 | Bestrophin 2 (Best2)                                         | 100  | 100 | 100  | Wings small and severely malformed                                     |
| BL39040                             | CG12327 | Bestrophin 3 (Best3)                                         | 100  | 40  | 66   | Small narrow wings (male), missing ACV, L2 bifurcation, PCV incomplete |
| BL28013                             | CG14723 | Histamine-gated chloride channel subunit 1 (HsCl1)           | 26   | 8   | 17   | L4/L5 bifurcation, Incomplete L5, missing ACV                          |
| <b>Ligand-gated Cation Channels</b> |         |                                                              |      |     |      |                                                                        |
| BL62391                             | CG15326 | Ionotropic receptor 7b (Ir7b)                                | 86   | 97  | 92   | PCV incomplete or bifurcation, L5 bifurcation                          |
| BL34678                             | CG42584 | Ionotropic receptor 76a (Ir76a)                              | 97   | 46  | 74   | PCV incomplete, L5 bifurcation                                         |
| BL53975                             | CG17382 | Ionotropic receptor 94h (Ir94h)                              | 24   | 29  | 27   | Bristle defects                                                        |
| BL25836                             | CG4226  | Glutamate receptor IIC (GluRIIC)                             | 24   | 24  | 14   | L4 & L5 bifurcations, L5 incomplete                                    |
| BL61898                             | CG15732 | Ionotropic receptor 11a (Ir11a)                              | 2.7  | 23  | 12   |                                                                        |
| BL25813                             | CG32704 | Ionotropic receptor 8a (Ir8a)                                | 93   | 20  | 58   | PCV bifurcation, L4 & L5 bifurcations, PCV incomplete, ectopic veins   |
| BL25895                             | CG6927  | N/A                                                          | 73   | 16  | 39   | PCV incomplete, L5 bifurcation                                         |
| BL28351                             | CG8681  | Clumsy                                                       | 36   | 14  | 26   | Incomplete PCV, L4 & L5 bifurcations, ectopic veins, bristle defects   |
| BL25854                             | CG8916  | N/A                                                          | 83   | 13  | 50   | PCV incomplete, L4 & L5 bifurcations, ectopic veins                    |
| BL77160                             | CG15324 | Ionotropic receptor 7c (Ir7c)                                | 54   | 13  | 32   | Incomplete PCV & L5, L5 bifurcations, ectopic veins                    |
| BL57772                             | CG11775 | Ionotropic receptor 85a (Ir85a)                              | 38   | 13  | 24   |                                                                        |
| BL50668                             | CG17336 | Ligand-gated chloride channel homolog 3 (Lcch3)              | 86   | 12  | 49   | PCV& ACV incomplete, L4 & L5 bifurcations, L4 & L5 incomplete          |
| BL26009                             | CG17922 | Cyclic nucleotide-gated ion channel subunit B (CngB)         | 82   | 11  | 44   | PCV bifurcation, L4 & L5 bifurcations, ectopic veins, bristle defects  |
| BL25927                             | CG11822 | nicotinic Acetylcholine Receptor $\beta$ 3 (nAChR $\beta$ 3) | 38   | 6   | 22   | PCV & L5 bifurcations, PCV incomplete                                  |
| BL29451                             | CG3814  | Lifeguard (Lfg)                                              | 64   | 5   | 38   |                                                                        |
| BL27090                             | CG7589  | N/A                                                          | 50   | 4   | 27   | L3 & L4 & L5 bifurcations, PCV incomplete                              |
| BL31991                             | CG11155 | N/A                                                          | 55   | 3   | 31   |                                                                        |

|              |                     |                                                                 |      |    |      |                                                                       |
|--------------|---------------------|-----------------------------------------------------------------|------|----|------|-----------------------------------------------------------------------|
| BL31883      | CG11348             | nicotinic Acetylcholine Receptor $\beta 1$ (nAChR $\beta 1$ )   | 15   | 3  | 9    | L4 & L5 bifurcations, bristle defects                                 |
| BL27493      | CG6844              | nicotinic Acetylcholine Receptor $\alpha 2$ (nAChR $\alpha 2$ ) | 29   | 1  | 13   | PCV bifurcations, L5 bifurcations, ectopic veins                      |
| BL58056      | CG33492             | Ionotropic receptor 41a (Ir41a)                                 | 38   | 0  | 18   |                                                                       |
| BL57566      | CG42352             | Ionotropic receptor 40a (Ir40a)                                 | 20.4 | 0  | 10.3 | ACV missing                                                           |
| <b>Other</b> |                     |                                                                 |      |    |      |                                                                       |
| BL34078      | CG33348             | Chemosensory protein B 42a (CheB42a)                            | 93   | 54 | 69   | PCV incomplete or bifurcation, L2, L4 & L5 bifurcation, L5 incomplete |
| BL30501      | CG1448              | Innexin 3 (Inx3)                                                | 98   | 38 | 68   | PCV incomplete, L4 bifurcation, L5 bifurcation, L5 incomplete         |
| BL25806      | CG1090              | N/A                                                             | 45   | 9  | 20   | PCV bifurcations, PCV incomplete, L4 & L5 bifurcations                |
| BL62985      | CG4545              | Serotonin transporter (SerT)                                    | 100  | 0  | 48   | L3 bifurcations, thickened veins, ectopic veins                       |
| BL26007      | CG17140;<br>CG17139 | N/A                                                             | 40   | 0  | 17.3 |                                                                       |
| BL25886      | CG17137             | Porin2                                                          | 29   | 0  | 14   | PCV incomplete, L4 & L5 bifurcations                                  |
| BL31673      | CG8743              | Transient receptor potential cation channel, mucolipin (Trmp1)  | 26   | 0  | 13   | L4 & L5 bifurcations, incomplete PCV, ectopic veins                   |
