# Supplementary material
Source: publisher figshare collection journal article supplement (https://gsajournals.figshare.com/articles/dataset/_/7640345)
Supplement: Supplementary file 2 [file 1]

| Supplementary Table 2. Loss-of-function Mutant Lines Screened |                                       |                                                                |                                  |                                    |                                   |                                                          |
|---------------------------------------------------------------|---------------------------------------|----------------------------------------------------------------|----------------------------------|------------------------------------|-----------------------------------|----------------------------------------------------------|
| BL#/VRDC#                                                     | CG#                                   | Gene Name                                                      | Wing Defect %<br>Penetrance Male | Wing Defect %<br>Penetrance Female | Wing Defect %<br>Penetrance Total | Defect Phenotypes                                        |
| <b>Calcium Channels</b>                                       |                                       |                                                                |                                  |                                    |                                   |                                                          |
| BL14156                                                       | CG12295                               | straightjacket (stj)                                           | 48                               | 60                                 | 54                                | Bristle and pigment defects                              |
| BL13682                                                       | CG3725                                | Sarco/endoplasmic reticulum<br>Ca(2+)-ATPase (SERCA)           | 67                               | 76                                 | 40                                | Ectopic veins, ectopic bristles, pigment defect          |
| BL19957                                                       | CG34322; CG42447;<br>CG34321          | inaF-A; B; C                                                   | 15                               | 50                                 | 31                                | PCV bifurcation                                          |
| BL38067                                                       | CG16793                               | brivido-2 (brv2)                                               | 20                               | 34                                 | 28                                | PCV bifurcation                                          |
| BL24768                                                       | CG4536                                | Inactive (iav)                                                 | 0                                | 25                                 | 15                                | Incomplete L5 (wings in females had very little pigment) |
| BL44364                                                       | CG10844                               | Ryanodine receptor (RyR)                                       | 0                                | 32                                 | 13                                |                                                          |
| BL41799                                                       | CG34322; CG42447;<br>CG34321; CG42563 | InaF-A; B; C; D                                                | 2                                | 16.1                               | 7.4                               | PCV bifurcation                                          |
| BL19179                                                       | CG15899                               | Ca2+-channel protein $\alpha$ 1 subunit<br>T (Ca- $\alpha$ 1T) | 7.6                              | 3.2                                | 5.2                               | Incomplete L5, L4 bifurcation                            |
| BL13282                                                       | CG4894                                | Ca2+-channel protein $\alpha$ 1 subunit<br>D (Ca- $\alpha$ 1D) | 2                                | 5                                  | 3.6                               | PCV bifurcation, ectopic vein                            |
| BL32776                                                       | CG4587                                | N/A                                                            | 0                                | 0                                  | 0                                 | N/A                                                      |
| BL21983                                                       | CG6151                                | Flower (Few)                                                   | 0                                | 0                                  | 0                                 | N/A                                                      |
| BL23636                                                       | CG7875                                | Transient receptor potential (trp)                             | 0                                | 0                                  | 0                                 | N/A                                                      |
| BL60807                                                       | CG42314                               | plasma membrane calcium<br>ATPase (PMCA)                       | 0                                | 0                                  | 0                                 | N/A                                                      |
| BL25629                                                       | CG5996                                | Transient receptor potential<br>cation channel $\gamma$ (Trpy) | 0                                | 0                                  | 0                                 | N/A                                                      |
| <b>Sodium Channels</b>                                        |                                       |                                                                |                                  |                                    |                                   |                                                          |
| BL37430                                                       | CG34405                               | Na channel protein 60E<br>(NaCP60E)                            | 81                               | 100                                | 90                                | PCV bifurcation, pigment abnormality                     |
| BL13221                                                       | CG12806                               | tipE homolog 1 (Teh1)                                          | 70                               | 91                                 | 81                                | Black spots below L5                                     |
| BL38075                                                       | CG3478                                | pickpocket (ppk)                                               | 42                               | 52                                 | 47                                | PCV bifurcation                                          |
| BL42469                                                       | CG18437                               | Uncoordinated 80 (unc80)                                       | 62                               | 24                                 | 43                                | PCV bifurcation, ectopic vein, pigment defect            |
| BL58557                                                       | CG13278                               | pickpocket 17 (ppk17)                                          | 18.1                             | 31.3                               | 25                                | PCV bifurcation, L2 bifurcation, L3 bifurcation          |
| BL23397                                                       | CG5237                                | Uncoordinated 79 (Unc79)                                       | 9                                | 36                                 | 23                                | PCV bifurcation                                          |
| BL74                                                          | CG1517                                | narrow abdomen (na)                                            | 37                               | 5                                  | 22                                | Bristle defects, ectopic vein                            |
| BL42372                                                       | CG15004                               | tipE homolog 2 (Teh2)                                          | 0                                | 31                                 | 18                                | L4 & PCV bifurcation, black spots on wgs, PCV incomplete |

|                           |         |                                                              |      |      |      |                                                                  |
|---------------------------|---------|--------------------------------------------------------------|------|------|------|------------------------------------------------------------------|
| BL20643                   | CG34369 | pickpocket 9 (ppk9)                                          | 7.3  | 26.8 | 17   | PCV bifurcation, pigment defects                                 |
| BL60687                   | CG9907  | Paralytic (Para)                                             | 10   | 20   | 15   | ACV/PCV bifurcation, incomplete L5, L5 bifurcation, ectopic vein |
| BL25571                   | CG44152 | pickpocket 18 (ppk18)                                        | 20.3 | 5.4  | 13.3 | Bristle defects, pigment defects, ectopic vein                   |
| BL23071                   | CG7577  | pickpocket 20 (ppk20)                                        | 0    | 17.7 | 8.5  | Vein pigment defects                                             |
| BL19016                   | CG13568 | pickpocket 29 (ppk29)                                        | 11   | 3    | 7    | Vein pigment defects                                             |
| BL55548                   | CG18110 | pickpocket 30 (ppk30)                                        | 13   | 0    | 7    | Bristle defect, PCV bifurcation                                  |
| BL33300                   | CG8527  | pickpocket 23 (ppk23)                                        | 9    | 0    | 5    | Vein pigment defects                                             |
| BL33559                   | CG4805  | pickpocket 28 (ppk28)                                        | 0    | 5    | 3    | PCV incomplete                                                   |
| BL26701                   | CG9907  | Paralytic (Para)                                             | 0    | 3    | 2    | L5 incomplete                                                    |
| BL29179                   | CG10972 | pickpocket 12 (ppk12)                                        | 0    | 2.9  | 1.1  | Ectopic veins                                                    |
| BL44998                   | CG10858 | pickpocket 27 (ppk27)                                        | 0    | 0    | 0    | N/A                                                              |
| BL37590                   | CG12048 | pickpocket 21 (ppk21)                                        | 0    | 0    | 0    | N/A                                                              |
| BL27869                   | CG34059 | pickpocket 16 (ppk16)                                        | 0    | 0    | 0    | N/A                                                              |
| BL55464                   | CG42253 | Na+-driven anion exchanger 1 (Ndae1)                         | 0    | 0    | 0    | N/A                                                              |
| BL25293                   | CG18287 | pickpocket 19 (ppk19)                                        | 0    | 0    | 0    | N/A                                                              |
| BL23781                   | CG34058 | pickpocket 11 (ppk11)                                        | 0    | 0    | 0    | N/A                                                              |
| <b>Potassium Channels</b> |         |                                                              |      |      |      |                                                                  |
| BL59167                   | CG9637  | TWIK-related acid-sensitive K <sup>+</sup> channel 6 (Task6) | 100  | 100  | 100  | PCV bifurcation                                                  |
| BL22837                   | CG12348 | Shaker (Sh)                                                  | 21   | 85   | 54   | PCV bifurcation                                                  |
| BL37284                   | CG33135 | KCNQ potassium channel                                       | 20   | 51   | 29   | PCV bifurcation                                                  |
| BL59589                   | CG42732 | slowpoke 2 (SLO2)                                            | 6    | 37   | 23   | PCV incomplete                                                   |
| BL15623                   | CG32810 | insomniac (inc)                                              | 0    | 38   | 18   | PCV bifurcation                                                  |
| BL18766                   | CG34366 | Shaw-like (ShawI)                                            | 10.8 | 20.6 | 15.5 | Bristle defect                                                   |
| BL59687                   | CG43155 | N/A                                                          | 6.4  | 13   | 10.4 | PCV bifurcation                                                  |
| BL42329                   | CG42701 | Cyclic nucleotide-gated ion channel subunit A (CngA)         | 0    | 12   | 6    | Ectopic vein                                                     |
| BL21935                   | CG3182  | Seizure (Sei)                                                | 0    | 6    | 3    | Curvy PCV                                                        |
| BL22786                   | CG2822  | Shaker cognate w (Shaw)                                      | 0    | 6    | 2    | PCV bifurcation                                                  |
| BL55                      | CG43388 | Hyperkinetic (Hk)                                            | 0    | 4    | 2    | PCV bifurcation                                                  |
| BL19302                   | CG11984 | Potassium channel modulatory factor 1 (Kcmf1)                | 3.2  | 0    | 1.6  | Crumpled                                                         |
| BL34450                   | CG1615  | Open rectifier K+ channel 1 (Ork1)                           | 0    | 2    | 1    | PCV bifurcation                                                  |

|                                     |         |                                                            |      |      |      |                                                      |
|-------------------------------------|---------|------------------------------------------------------------|------|------|------|------------------------------------------------------|
| BL24326                             | CG9262  | Shaker cognate I (Shal)                                    | 0    | 0    | 0    | N/A                                                  |
| BL59746                             | CG42340 | N/A                                                        | 0    | 0    | 0    | N/A                                                  |
| BL18379                             | CG2121  | N/A                                                        | 0    | 0    | 0    | N/A                                                  |
| BL23791                             | CG1688  | N/A                                                        | 0    | 0    | 0    | N/A                                                  |
| BL24184                             | CG10952 | ether a go go (eag)                                        | 0    | 0    | 0    | N/A                                                  |
| BL55477                             | CG4928  | N/A                                                        | 0    | 0    | 0    | N/A                                                  |
| BL12878                             | CG42594 | N/A                                                        | 0    | 0    | 0    | N/A                                                  |
| BL41481                             | CG43395 | Cyclic nucleotide-gated ion channel-like (Cngl)            | 0    | 0    | 0    | N/A                                                  |
| BL23623                             | CG8585  | Ih channel (Ih)                                            | 0    | 0    | 0    | N/A                                                  |
| BL24797                             | CG5076  | Eag-like K <sup>+</sup> channel (Elk)                      | 0    | 0    | 0    | N/A                                                  |
| BL23585                             | CG43128 | Shaker cognate b (Shab)                                    | 0    | 0    | 0    | N/A                                                  |
| BL29918                             | CG10693 | Slowpoke (Slo)                                             | 0    | 0    | 0    | N/A                                                  |
| BL51246                             | CG10706 | Small conductance calcium-activated potassium channel (SK) | 0    | 0    | 0    | N/A                                                  |
| <b>Chloride Channels</b>            |         |                                                            |      |      |      |                                                      |
| BL1687                              | CG10537 | Resistant to dieldrin (Rdl)                                | 92   | 95   | 94   | L2 incomplete, ectopic bristles, pigment defect      |
| BL6879                              | CG6264  | Bestrophin 1 (Best1)                                       | 70   | 100  | 85   | PCV bifurcation                                      |
| BL6353                              | CG7535  | GluCl $\alpha$                                             | 60   | 100  | 80   | Bristle defects                                      |
| BL27157                             | CG5284  | Chloride channel-c (CIC-c)                                 | 48   | 48   | 48   | Ectopic vein, incomplete L5                          |
| BL30596                             | CG7446  | Glycine receptor (Grd)                                     | 15.2 | 23.5 | 19.5 | PCV bifurcation, abnormal L5, ectopic vein           |
| BL56318                             | CG12344 | N/A                                                        | 9.4  | 19.2 | 15.2 | PCV & L2 bifurcation, ectopic veins, thickened veins |
| BL26996                             | CG8594  | Chloride channel-b (CIC-b)                                 | 10   | 12   | 11   | Incomplete PCV & L5, ACV bifurcation                 |
| BL14209                             | CG10997 | Chloride intracellular channel (Clic)                      | 0    | 11.6 | 6    | Crumpled                                             |
| BL23072                             | CG6938  | N/A                                                        | 9    | 0    | 4    | PCV bifurcation, thickened veins                     |
| BL13793                             | CG10353 | N/A                                                        | 0    | 0    | 0    | N/A                                                  |
| BL23622                             | CG7259  | Bestrophin 4 (Best 4)                                      | 0    | 0    | 0    | N/A                                                  |
| BL17827                             | CG11340 | pH-sensitive chloride channel 2 (pHCl-2)                   | 0    | 0    | 0    | N/A                                                  |
| BL42433                             | CG31116 | Chloride channel-a (CIC-a)                                 | 0    | 0    | 0    | N/A                                                  |
| <b>Ligand-gated Cation Channels</b> |         |                                                            |      |      |      |                                                      |
| BL56583                             | CG12525 | Ionotropic receptor 67a (Ir67a)                            | 80   | 75   | 77   | PCV bifurcation, L3 bifurcation, thick veins         |

|         |         |                                                                 |      |      |      |                                              |
|---------|---------|-----------------------------------------------------------------|------|------|------|----------------------------------------------|
| BL24880 | CG32538 | nicotinic Acetylcholine Receptor $\alpha 7$ (nAChR $\alpha 7$ ) | 42   | 67   | 52   | PCV bifurcation                              |
| BL37066 | CG7234  | Glutamate receptor IIB (GluRIIB)                                | 31   | 56   | 44   | PCV bifurcation                              |
| BL44812 | CG13225 | Odorant receptor 47a (Or47a)                                    | 32   | 51   | 42   | PCV bifurcation                              |
| BL59216 | CG4356  | muscarinic Acetylcholine Receptor, A-type (mAChR-A)             | 21   | 56   | 38   | PCV bifurcation, L4 incomplete               |
| BL31033 | CG10101 | Ionotropic receptor 84a (Ir84a)                                 | 50   | 34   | 34   | PCV bifurcation, thick veins                 |
| BL20783 | CG4128  | nicotinic Acetylcholine Receptor $\alpha 6$ (nAChR $\alpha 6$ ) | 26   | 32   | 29   | PCV bifurcation                              |
| BL41424 | CG32975 | nicotinic Acetylcholine Receptor $\alpha 5$ (nAChR $\alpha 5$ ) | 15   | 43   | 26   | PCV bifurcation                              |
| BL43017 | CG15685 | Ionotropic receptor 92a (Ir92a)                                 | 19.6 | 23.4 | 21.7 | Bristle defects, abnormal vein pigment       |
| BL25551 | CG17381 | Ionotropic receptor 94g (Ir94g)                                 | 29.5 | 8.6  | 20.3 | Bristle defects, abnormal vein pigment       |
| BL23130 | CG10609 | Odorant receptor co-receptor (Orco)                             | 25   | 13   | 20   | ectopic vein, pcv defect                     |
| BL42420 | CG15325 | Ionotropic receptor 7g (Ir7g)                                   | 8.5  | 31   | 18.7 | PCV bifurcation                              |
| BL18860 | CG8442  | Glutamate receptor IA (GluRIA)                                  | 2    | 24   | 12   | Incomplete PCV                               |
| BL24590 | CG11775 | Ionotropic receptor 85a (Ir85a)                                 | 14.2 | 0    | 7.4  | Bristle defect, dark veins                   |
| BL38037 | CG44240 | Transient receptor potential cation channel, subfamily M (Trpm) | 4    | 7    | 6    | L5 incomplete, p-cv bifurcation              |
| BL51274 | CG33513 | NMDA receptor 2 (Nmdar2)                                        | 8    | 4    | 6    | PCV bifurcation, incomplete L5               |
| BL17177 | CG2657  | Ionotropic receptor 21a (Ir21a)                                 | 2.3  | 4    | 3.2  | Wing failed to expand                        |
| BL56692 | CG2902  | NMDA receptor 1 (Nmdar1)                                        | 0    | 6    | 3    | PCV bifurcation, L5 incomplete, ectopic vein |
| BL30697 | CG14585 | Ionotropic receptor 75a (Ir75a)                                 | 3.3  | 0    | 1.6  | -                                            |
| BL17952 | CG18039 | Glutamate receptor IID (GluRIID)                                | 0    | 3    | 1    | L5 abnormality                               |
| BL35084 | CG6798  | nicotinic Acetylcholine Receptor $\beta 2$ (nAChR $\beta 2$ )   | 0    | 0    | 0    | N/A                                          |
| BL26031 | CG6185  | Ionotropic receptor 68a (Ir68a)                                 | 0    | 0    | 0    | N/A                                          |
| BL60983 | CG42297 | Ionotropic receptor 94d (Ir94d)                                 | 0    | 0    | 0    | N/A                                          |
| BL23473 | CG13195 | Ionotropic receptor 48b (Ir48b)                                 | 0    | 0    | 0    | N/A                                          |
| BL44208 | CG30468 | Ionotropic receptor 52c (Ir52c)                                 | 0    | 0    | 0    | N/A                                          |
| BL23417 | CG43743 | Glutamate receptor IB (GluRIB)                                  | 0    | 0    | 0    | N/A                                          |
| BL51309 | CG7385  | Ionotropic receptor 76b (Ir76b)                                 | 0    | 0    | 0    | N/A                                          |
| BL27789 | CG15627 | Ionotropic receptor 25a (Ir25a)                                 | 0    | 0    | 0    | N/A                                          |

|              |         |                                                                 |     |    |     |                     |
|--------------|---------|-----------------------------------------------------------------|-----|----|-----|---------------------|
| BL29090      | CG12303 | Ionotropic receptor 67b (Ir67b)                                 | 0   | 0  | 0   | N/A                 |
| BL24332      | CG5621  | Grik                                                            | 0   | 0  | 0   | N/A                 |
| BL18663      | CG3822  | Kainate-type ionotropic glutamate receptor subunit 1D (KaiR1D)  | 0   | 0  | 0   | N/A                 |
| BL23757      | CG6992  | Glutamate receptor IIA (GluRIIA)                                | 0   | 0  | 0   | N/A                 |
| BL27818      | CG15121 | Ionotropic receptor 56b (Ir56b)                                 | 0   | 0  | 0   | N/A                 |
| BL23404      | CG42260 | N/A                                                             | 0   | 0  | 0   | N/A                 |
| BL60827      | CG9935  | Eye-enriched kainate receptor (Ekar)                            | 0   | 0  | 0   | N/A                 |
| BL42295      | CG5610  | nicotinic Acetylcholine Receptor $\alpha 1$ (nAChR $\alpha 1$ ) | 0   | 0  | 0   | N/A                 |
| BL24610      | CG10633 | Ionotropic receptor 64a (Ir64a)                                 | 0   | 0  | 0   | N/A                 |
| BL24205      | CG14076 | Ionotropic receptor 75d (Ir75d)                                 | 0   | 0  | 0   | N/A                 |
| BL59748      | CG30469 | Ionotropic receptor 52b (Ir52b)                                 | 0   | 0  | 0   | N/A                 |
| BL23842      | CG34143 | Ionotropic receptor 10a (Ir10a)                                 | 0   | 0  | 0   | N/A                 |
| BL24810      | CG42315 | Ionotropic receptor 93a (Ir93a)                                 | 0   | 0  | 0   | N/A                 |
| BL36422      | CG12414 | nicotinic Acetylcholine Receptor $\alpha 4$ (nAChR $\alpha 4$ ) | 0   | 0  | 0   | N/A                 |
| BL14320      | CG2302  | nicotinic Acetylcholine Receptor $\alpha 3$ (nAChR $\alpha 3$ ) | 0   | 0  | 0   | N/A                 |
| BL31853      | CG11575 | Ionotropic receptor 100a (Ir100a)                               | 0   | 0  | 0   | N/A                 |
| <b>Other</b> |         |                                                                 |     |    |     |                     |
| BL59187      | CG18549 | N/A                                                             | 69  | 97 | 83  | PCV bifurcation     |
| BL26124      | CG5685  | Na/Ca-exchange protein (Calx)                                   | 8.5 | 6  | 7.4 | Black spots on wing |
| BL24524      | CG34358 | shaking B (ShakB)                                               | 0   | 5  | 3   | PCV bifurcation     |
| BL1595       | CG4722  | Big brain (bib)                                                 | 0   | 2  | 1   | Incomplete L5       |
| BL29134      | CG18345 | transient receptor potential-like (trpl)                        | 0   | 0  | 0   | N/A                 |
| BL23470      | CG44122 | Piezo                                                           | 0   | 0  | 0   | N/A                 |
| BL43356      | CG6647  | Porin                                                           | 0   | 0  | 0   | N/A                 |
